# Supplementary material for: Genome-Wide Identification, Characterization, and Expression Analysis of CHS Gene Family Members in Chrysanthemum nankingense
Source: MDPI journal article supplement (doi:10.3390/genes13112145), 2022-11-18
Supplement: s1 [file s1]

**Supplementary Table S1.** The chalcone synthase family genes of *C. nankingense*

| Gene name | Gene ID        | Chromosomal position  | Location coordinates | Predicted Protein information |           |      | Predicted subcellular location |
|-----------|----------------|-----------------------|----------------------|-------------------------------|-----------|------|--------------------------------|
|           |                |                       |                      | Mw (Da)                       | Size (aa) | pI   |                                |
| CnCHS1    | CHR00061989-RA | utg3320_pilon_pilon   | 5699 - 7363          | 43792.77                      | 400       | 5.82 | cytoplasm                      |
| CnCHS2    | CHR00068181-RA | utg15112_pilon_pilon  | 67925 - 68985        | 35183.43                      | 320       | 5.17 | cytoplasm                      |
| CnCHS3    | CHR00062939-RA | utg15963_pilon_pilon  | 13243 - 14247        | 36615.35                      | 334       | 5.29 | Nucleus                        |
| CnCHS4    | CHR00027878-RA | utg18620_pilon_pilon  | 117603 - 119046      | 42931.55                      | 390       | 6.14 | chloroplast                    |
| CnCHS5    | CHR00018287-RA | utg21191_pilon_pilon  | 234722 - 236142      | 39667.79                      | 360       | 8.17 | cytoplasm                      |
| CnCHS6    | CHR00019175-RA | utg31268_pilon_pilon  | 236204 - 237780      | 43550.25                      | 398       | 5.79 | chloroplast                    |
| CnCHS7    | CHR00019176-RA | utg31268_pilon_pilon  | 244981 - 246465      | 40432.75                      | 367       | 6.47 | chloroplast                    |
| CnCHS8    | CHR00047213-RA | utg33468_pilon_pilon  | 72474 - 73883        | 42800.38                      | 389       | 5.87 | cytoplasm                      |
| CnCHS9    | CHR00077726-RA | utg33905_pilon_pilon  | 49032 - 50430        | 32458.79                      | 296       | 6.06 | cytoplasm                      |
| CnCHS10   | CHR00059250-RA | utg34566_pilon_pilon  | 21965 - 22957        | 36976.17                      | 330       | 9.46 | chloroplast                    |
| CnCHS11   | CHR00080912-RA | utg50200_pilon_pilon  | 18557 - 20279        | 41666.91                      | 378       | 5.85 | chloroplast                    |
| CnCHS12   | CHR00073521-RA | utg51561_pilon_pilon  | 12425 - 13968        | 22686.91                      | 202       | 6.44 | cytoplasm                      |
| CnCHS13   | CHR00028844-RA | utg57825_pilon_pilon  | 38412 - 40582        | 43864.65                      | 401       | 6.11 | cytoplasm                      |
| CnCHS14   | CHR00062418-RA | utg64979_pilon_pilon  | 49591 - 51181        | 43551.28                      | 398       | 6.04 | cytoplasm                      |
| CnCHS15   | CHR00077616-RA | utg69937_pilon_pilon  | 4299 - 5702          | 43438.20                      | 396       | 7.16 | cytoplasm                      |
| CnCHS16   | CHR00079924-RA | utg257772_pilon_pilon | 5445 - 6136          | 21773.13                      | 197       | 5.18 | cytoplasm                      |
